# Supplementary material for: Major comorbid conditions in asthma and association with asthma-related hospitalizations and emergency department admissions in adults: results from the German national health telephone interview survey (GEDA) 2010
Source: PubMed Central journal article supplement (PMC3718654; doi:10.1186/1471-2466-13-46), 2013-07-12
Supplement: 1471-2466-13-46-S1.pdf [file 1471-2466-13-46-S1.pdf]

**Additional Table 4.a - Sex-specific association of comorbidities with any vs. no asthma-related hospitalization/ED admission in the past year.**

| Any vs. no asthma-related hospitalization/ED admission in the past year |                | Current allergic rhinitis (yes vs. no) OR (95%-CI) | Current GERS (yes vs. no) OR (95%-CI) | AERD (yes vs. no) OR (95%-CI) |
|-------------------------------------------------------------------------|----------------|----------------------------------------------------|---------------------------------------|-------------------------------|
| <b>Men</b>                                                              | <b>Model 4</b> |                                                    |                                       |                               |
|                                                                         | no             | 1.00                                               | 1.00                                  | 1.00                          |
|                                                                         | yes            | 1.05 (0.41–2.66)                                   | 0.71 (0.26–1.92)                      | 4.37 (1.64–11.64)             |
| <b>Women</b>                                                            | <b>Model 4</b> |                                                    |                                       |                               |
|                                                                         | no             | 1.00                                               | 1.00                                  | 1.00                          |
|                                                                         | yes            | 1.68 (0.83–3.42)                                   | 1.50 (0.81–2.80)                      | 4.71 (2.27–9.78)              |
| <b>Model 5</b>                                                          |                |                                                    |                                       |                               |
| Interaction term sex*comorbid condition                                 |                | 0.14                                               | 0.24 0.74                             |                               |

Odds ratio (OR) with 95% confidence interval (95%-CI) obtained from logistic regression models. \*Model 4, adjusted for age group (18–29, 30–44, 45–64, ≥87), educational attainment, smoking status, BMI status, and asthma duration; model 5, adjusted for age group (18–29, 30–44, 45–64, ≥65), sex, educational attainment, smoking status, and BMI status, asthma duration plus sex\*current allergic rhinitis/current GERS/AERD. Gastroesophageal reflux disease-like symptoms (GERS); acetylsalicylic acid exacerbated respiratory disease (AERD).
