# Supplementary material for: Major comorbid conditions in asthma and association with asthma-related hospitalizations and emergency department admissions in adults: results from the German national health telephone interview survey (GEDA) 2010
Source: PubMed Central journal article supplement (PMC3718654; doi:10.1186/1471-2466-13-46), 2013-07-12
Supplement: 1471-2466-13-46-S2.pdf [file 1471-2466-13-46-S2.pdf]

**Additional Table 4.b - Age-specific association of comorbidities with any vs. no asthma-related hospitalization/ED admission in the past year.**

| Any vs. no asthma-related hospitalization/ED admission in the past year |                | Current allergic rhinitis (yes vs. no) OR (95%-CI) | Current GERS (yes vs. no) OR (95%-CI) | AERD (yes vs. no) OR (95%-CI) |
|-------------------------------------------------------------------------|----------------|----------------------------------------------------|---------------------------------------|-------------------------------|
| <b>Age &lt;55 years</b>                                                 | <b>Model 6</b> |                                                    |                                       |                               |
|                                                                         | no             | 1.00                                               | 1.00                                  | 1.00                          |
|                                                                         | yes            | 1.72 (0.81–3.67)                                   | 1.10 (0.55–2.20)                      | 4.69 (2.18–10.10)             |
| <b>Age ≥55 years</b>                                                    | <b>Model 6</b> |                                                    |                                       |                               |
|                                                                         | no             | 1.00                                               | 1.00                                  | 1.00                          |
|                                                                         | yes            | 0.68 (0.19–2.46)                                   | 1.55 (0.60–3.97)                      | 4.56 (1.66–12.54)             |
| <b>Model 7</b>                                                          |                |                                                    |                                       |                               |
| Interaction term age group (≥55 vs. <55)*comorbid condition             |                | 0.07                                               | 0.64                                  | 0.83                          |
|                                                                         |                |                                                    |                                       |                               |

Odds ratio (OR) with 95% confidence interval (95%-CI) obtained from logistic regression models. \*Model 6, adjusted for age group (18–29, 30–44, 45–64, ≥65), sex, educational attainment, smoking status, and BMI status, asthma duration; model 7, adjusted for age group (≥55 vs. <55), age, sex, educational attainment, smoking status, and BMI status, asthma duration plus age group (≥55 vs. <55)\*current allergic rhinitis/current GERS/AERD. Gastroesophageal reflux disease-like symptoms (GERS), and acetylsalicylic acid exacerbated respiratory disease (AERD).
